# Supplementary material
Source: PubMed Central journal article supplement (PMC3822328)
Supplement: NIHMS489578-supplement-1.pdf [file NIHMS489578-supplement-1.pdf]

# Supplementary Figure 1

C. elegans TTCACCAAAGCTCTATCCGAACGAGTACGAATCACACATGCC-----  
C. remanei TTTCCCACAGTTCTACTAGAATG---TCACATGTCATTCGCC-----  
C. briggsae =====  
C. brenneri -----TCTATTCAAACGGGCTCCCTTCCCCCAGACC-----

C. elegans -----TCCCCCACAAATTATTG--ATCTACATCCCCATTTGGTATAGTGT  
C. remanei -----CCGCCCACCTTCCCATAGTTAAC-----ATAGTGA  
C. briggsae =====ATAGTGA  
C. brenneri -----CCGCCCCCTACACACAA--AAC-----ATAGTGG

C. elegans CTTACAGGACTCTCAATATGTCAGCTGCATGATAAATGGTCCCTATATAAT  
C. remanei CGTGCGGAACCCGGGAGATGTCGGTACTTCCAAGACGTCCCTATATAAG  
C. briggsae CGCGCGAAACCCGGGAGATGTCGGCTGCTATCTAGGGGGTCCCTATATAAA  
C. brenneri AGGGCGGAACCCGTGAGATGTCGGCTGCTGTGTAGGTACCCCCTATATAAG

C. elegans TGAATTGCAAATCTA-AATGTTTGTTCCTTCCGAGAACATATACTAAAATTG  
C. remanei AAACCTTTCTTCTGAATAGATATTGTTCTTCCGAGAACATATACTAAAATTG  
C. briggsae CAGATGACCTATAGA-AGATTTTCGTTCTTCCGAGAACATCAACTAAAATTG  
C. brenneri GGGGTGCCCTTTCCAAGCATCTCGTTCTTCCGAGAACATATACTAAAATTG

C. elegans GAACAATACAGAGAAGATTAGCATGGCCCCTGCGCAAGGATGACACGCAAA  
C. remanei GAACAATACAGAGAAGATTAGCATGGCCCCTGCGCAAGGATGACACGCAAA  
C. briggsae GAACAATACAGAGAAGATTAGCATGGCCCCTGCGCAAGGATGACACGCAAA  
C. brenneri GAACAATACAGAGAAGATTAGCATGGCCCCTGCGCAAGGATGACACGCAAA

C. elegans TTCGTGAAGCGTTCCAAATTTTTTCAATAATATTCTA-----GATATCCCT  
C. remanei TTCGTGAAGCGTTCCAAATTTTTT--GTCTAATTTTG=====  
C. briggsae TTCGTGAAGCGTTCCAAATTTTTT--GTCCGATTTTA-----TTTGATGAC  
C. brenneri TTCGTGAAGCGTTCCAAATTTTTT-----GGTATCAAC

C. elegans TTTTGAAACTAA-AAT-----GAAATACTCTAAATTTTTT--GA-----  
C. remanei =====  
C. briggsae CTG---ATAAGAAAT-----AATGT-----AAATTTTGGAACTAT  
C. brenneri CTTTACCATTAG-AAT-----AATTTGTTTCGAAGGATTT-----

**Supplementary Fig. 1:** A putative U6 snRNA locus found on *C. elegans* Chromosome IV and aligned with similar sequences from three other Caenorhabditis species. In green is the conserved snRNA sequence; our promoter conservatively includes 500 bases of upstream sequence and 237 bases of downstream sequence that flank it.

# Supplementary Figure 2

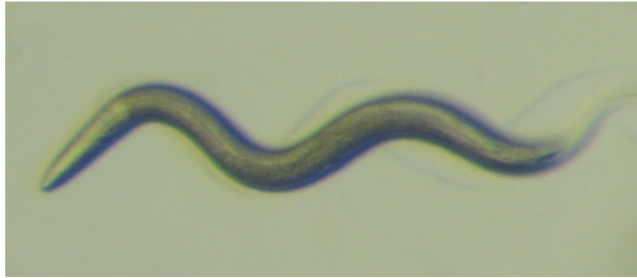

wild type

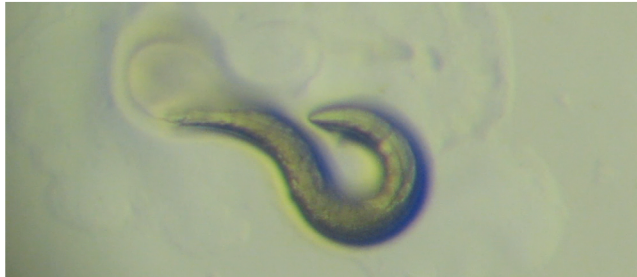

disrupted *unc-119*

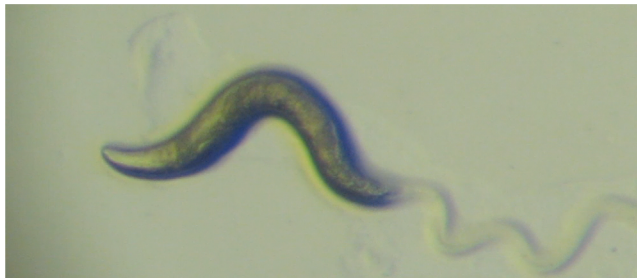

disrupted *dpy-13*

**Supplementary Fig. 2:** Images of worms from our wild-type background line, a disrupted *unc-119* line, and a disrupted *dpy-13* line.

# Supplementary Figure 3

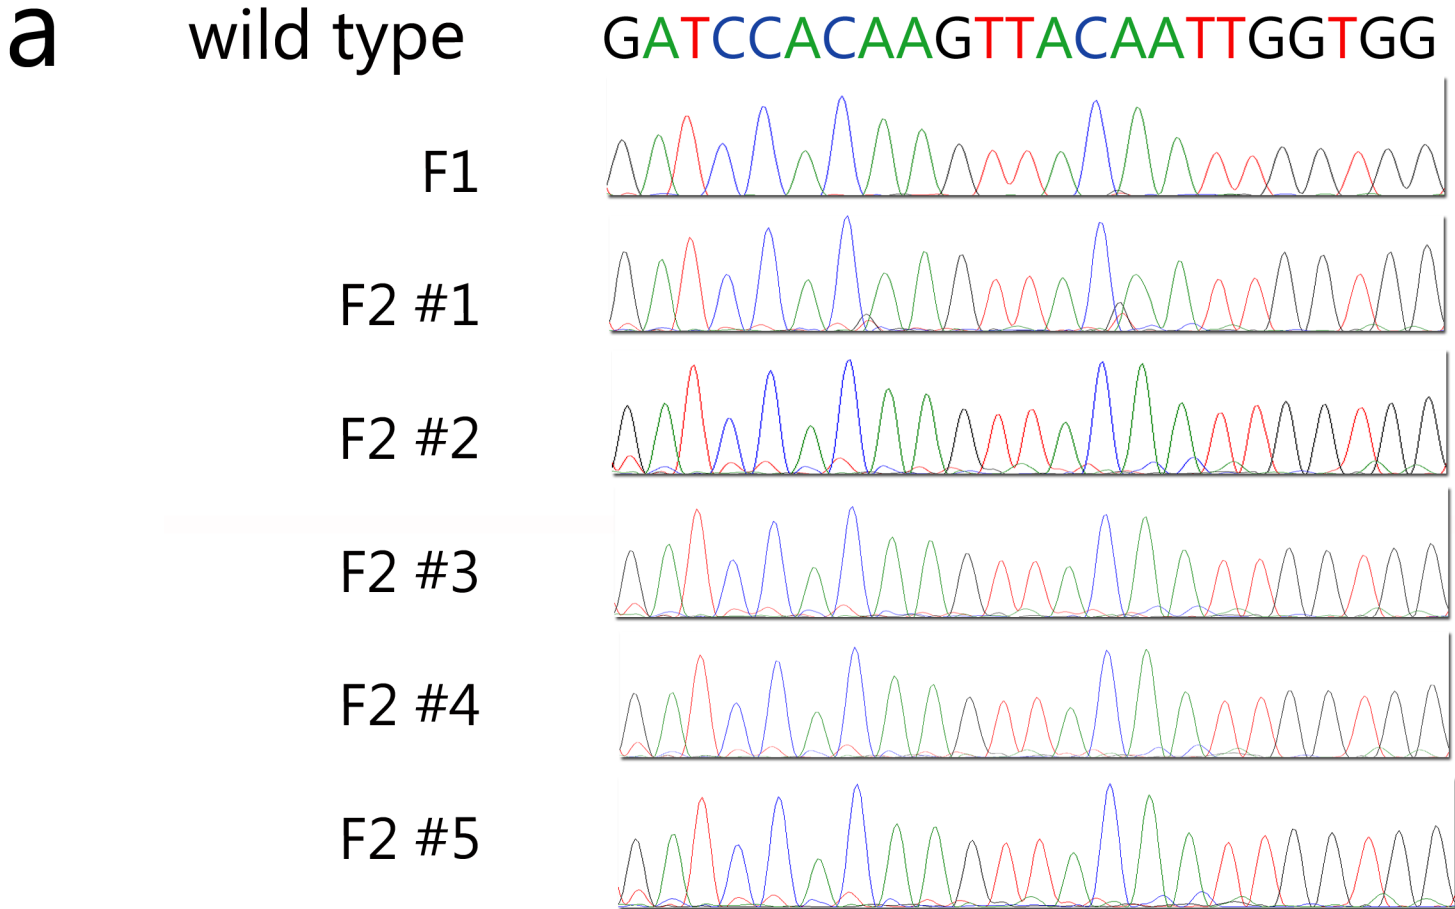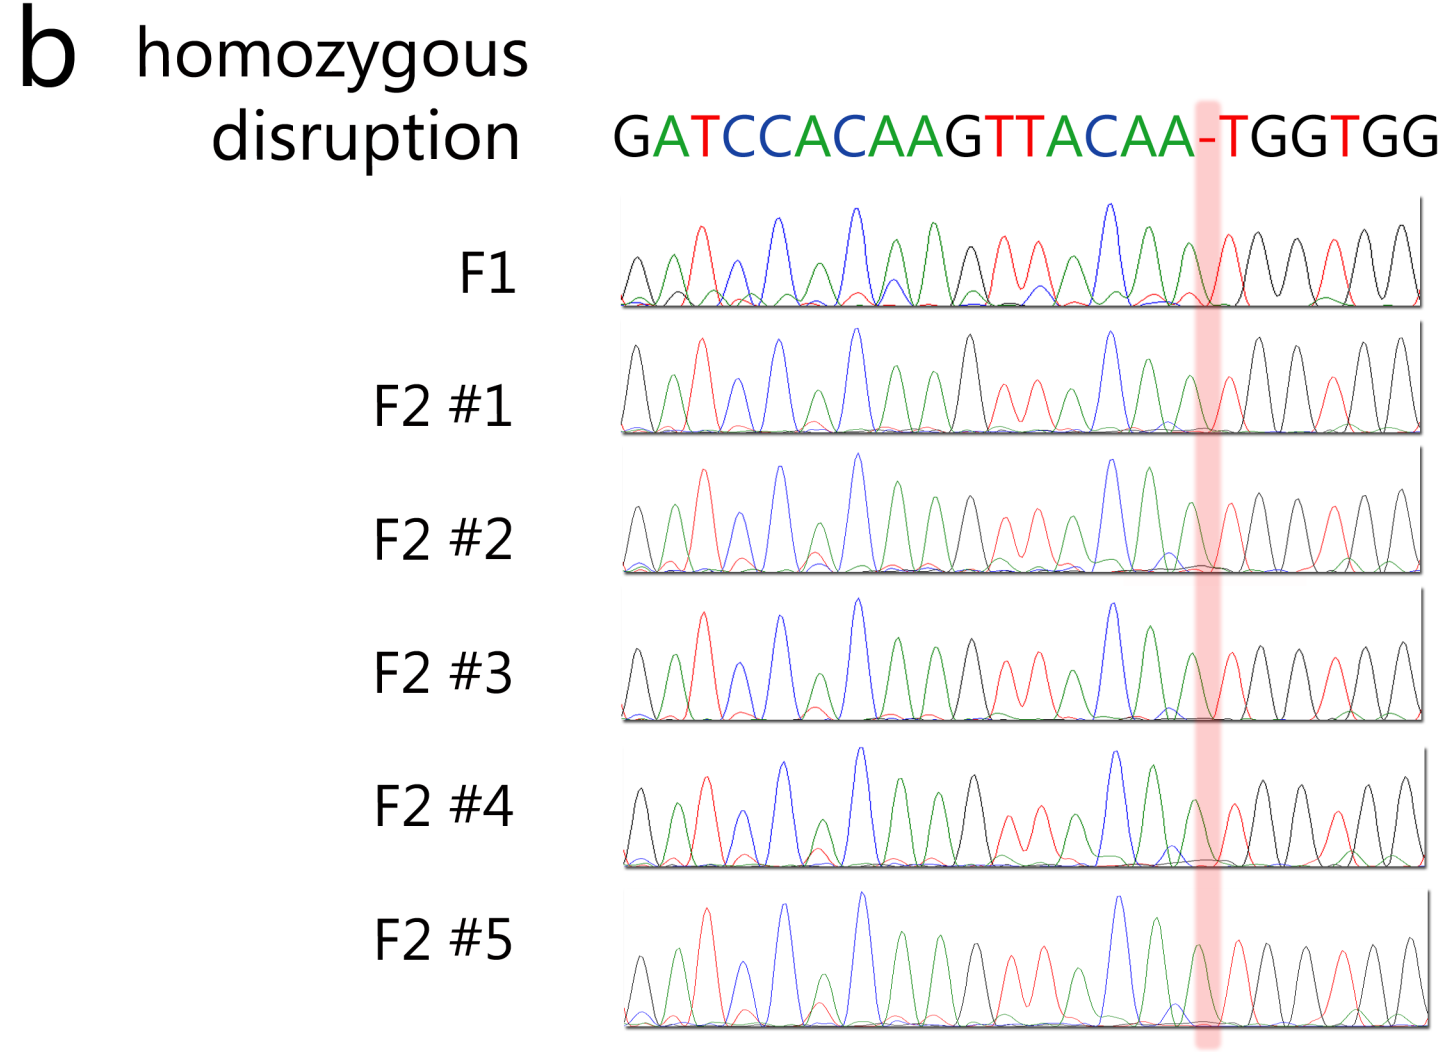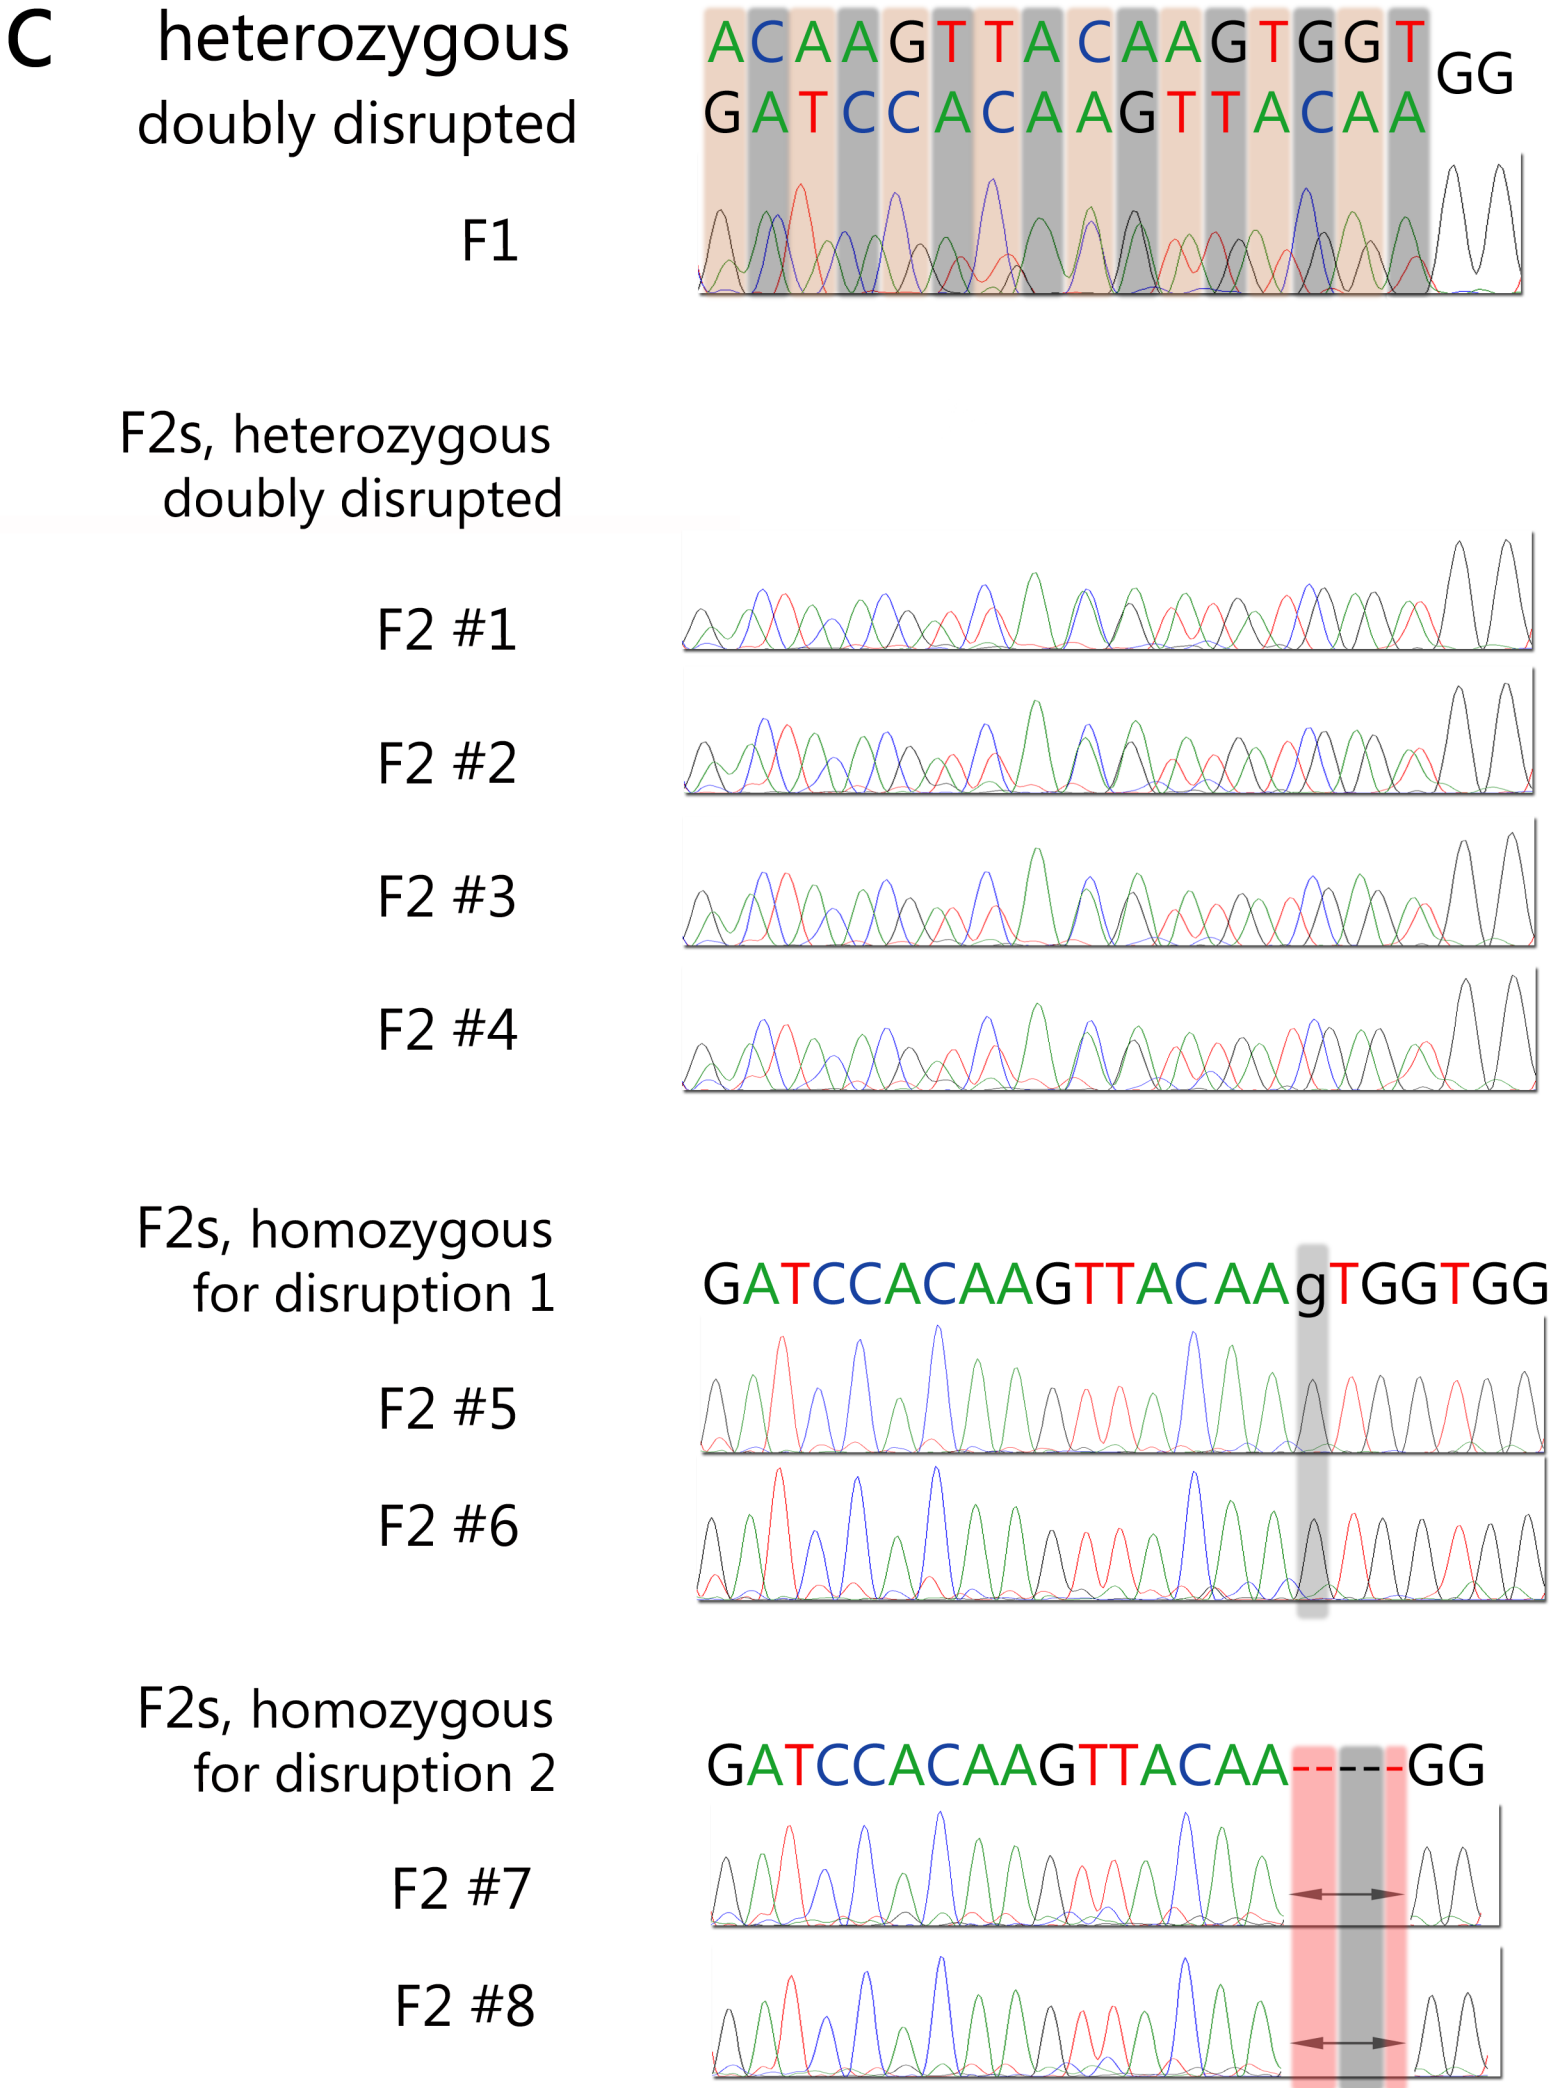

**Supplementary Fig. 3:** Sequencing results of F<sub>1</sub> and F<sub>2</sub> progeny from animals injected with cas9 and sgRNAs specific for the *k1p-12* locus. (A) The sequence and traces of a wild-type F<sub>1</sub> and five of its F<sub>2</sub> progeny. (B) The sequence and traces of a disrupted F<sub>1</sub>, carrying two copies of the same allele, and five of its F<sub>2</sub> progeny, all of which were also homozygous for the same disruption. (C) The sequences and traces of a heterozygous, doubly disrupted F<sub>1</sub> (each deciphered mutant sequence is listed above the sequencing trace) and eight of its F<sub>2</sub> progeny. Four of these eight F<sub>2</sub> progeny are similarly heterozygous, while two are homozygous for one disrupted allele and the last two are homozygous for the other disrupted allele. In all cases, the final three nucleotides (TGG) represent the PAM sequence.



# Supplementary Figure 4

Target *unc-119* sequence: GAATTTTCTG AAATTAAGA CGG  
Off-Target sequence 1: GAGGTTT**GAG** AAATTAAGA CGG  
N2: GAGGTTTGAG AAATTAAGA CGG  
*unc-119* mutant 1: GAGGTTTGAG AAATTAAGA CGG  
*unc-119* mutant 2: GAGGTTTGAG AAATTAAGA CGG

Target *unc-119* sequence: GAATTTTCTG AAATTAAGA CGG  
Off-Target sequence 2: **ATTCTG**TTTG AAATTAAGA **TGG**  
N2: ATTCTGTTTG AAATTAAGA TGG  
*unc-119* mutant 1: ATTCTGTTTG AAATTAAGA TGG  
*unc-119* mutant 2: ATTCTGTTTG AAATTAAGA TGG

Target *unc-119* sequence: GAATTTTCTG AAATTAAGA CGG  
Off-Target sequence 3: **TAATTTT****AGG** AAATTAAGA **AGG**  
N2: TAATTTTAGG AAATTAAGA AGG  
*unc-119* mutant 1: TAATTTTAGG AAATTAAGA AGG  
*unc-119* mutant 2: TAATTTTAGG AAATTAAGA AGG

Target *dpy-13* sequence: GGACATTGAC ACTAAAATCA AGG  
Off-Target sequence 1: **TTCAATTGCC** ACTAAAATCA **TGG**  
N2: TTCAATTGCC ACTAAAATCA **TGG**  
*dpy-13* mutant 1: TTCAATTGCC ACTAAAATCA **TGG**

Target *dpy-13* sequence: GGACATTGAC ACTAAAATCA AGG  
Off-Target sequence 2: **GC AAAATTCC** ACTAAAATCA AGG  
N2: GCAAAATTCC ACTAAAATCA AGG  
*dpy-13* mutant 1: GCAAAATTCC ACTAAAATCA AGG

Target *klp-12* sequence: GATCCACAAG TTACAATTGG TGG  
Off-Target sequence 1: **CCACTTGAAG** TTACAATTGG TGG  
N2: CCACTTGAAG TTACAATTGG TGG  
*klp-12* mutant 1: CCACTTGAAG TTACAATTGG TGG  
*klp-12* mutant 2: CCACTTGAAG TTACAATTGG TGG

Target *Y61A9LA.1* sequence: GGATGGATGT GTAGTCAATT CGG  
Off-Target sequence 1: **CCTCCTCACT** GTAGTCAATT **TGG**  
N2: CCTCCTCACT GTAGTCAATT TGG  
*Y61A9LA.1* mutant 1: CCTCCTCACT GTAGTCAATT TGG  
*Y61A9LA.1* mutant 2: CCTCCTCACT GTAGTCAATT TGG

Target *Y61A9LA.1* sequence: GGATGGATGT GTAGTCAATT CGG  
Off-Target sequence 2: **CACTTCGATT** GTAGTCAATT **TGG**  
N2: CACTTCGATT GTAGTCAATT TGG  
*Y61A9LA.1* mutant 1: CACTTCGATT GTAGTCAATT TGG  
*Y61A9LA.1* mutant 2: CACTTCGATT GTAGTCAATT TGG

**Supplementary Fig. 4:** Genotyping results at off-target loci. Mismatches between targeting sgRNAs and off-target loci are highlighted in red. In all examined cases, no indels were found at the off-target loci.



## Supplementary Table 1

| Experiment                     | F1s | Disruptions |
|--------------------------------|-----|-------------|
| Cas9 only                      | 150 | 0           |
| sgRNA only                     | 150 | 0           |
| Cas9 + gRNA,<br>F1s mCherry(-) | 214 | 0           |
| Total                          | 514 | 0           |

**Supplementary Table 1:** Summary of results from control microinjection experiments. No mutants were recovered.

## Synthesized codon-optimized Cas9-intron-SV40 NLS sequence

ATGGACAAGAAGTACTCCATCGGACTCGACATCGGAACCAACTCCGTCGGA  
TGGGCCGTCATCACCGACGAGTACAAGGTCCCATCCAAGAAGTTCAAGGTC  
CTCGGAAACACCGACCGTCACTCCATCAAGAAGAACCTCATCGGAGCCCTCC  
TCTTCGACTCCGGAGAGACCGCCGAGGCCACCCGTCTCAAGCGTACCGCCCCG  
TCGTCTGTTACACCCGTCTGTAAGAACCGTATCTGCTACCTCCAGGAGATCTTCT  
CCAACGAGATGGCCAAGGTGACGACTCCTTCTTCCACCGTCTCGAGGAGTC  
CTTCTCGTTCGAGGAGGACAAGAAGCACGAGCGTCAACCAATCTTCGGAAA  
CATCGTCGACGAGGTGCTTACCACGAGAAGTACCCAACCATCTACCACCTC  
CGTAAGAAGCTCGTTCGACTCCACCGACAAGGCCGACCTCCGTCTCATCTACC  
TCGCCCTCGCCACATGATCAAGTTCCGTGGACACTTCTCATCGAGGGAG  
ACCTCAACCCAGACAACCTCCGACGTGACAAGCTTTCATCCAGCTCGTCCAG  
ACCTACAACCAGCTCTTCGAGGAGAACCCAATCAACGCCTCCGGAGTCGACG  
CCAAGGCCATCCTCTCCGCCCGTCTCTCCAAGTCCCGTCTCGAGAACCTC  
ATCGCCAGCTCCAGGAGAGAAGAAGAACGGACTTTCGGAAACCTCATC  
GCCCTCTCCCTCGGACTCACCCCAAACCTTCAAGTCCAACCTTCGACCTCGCCGA  
GGACGCCAAGCTCCAGCTCTCCAAGGACACCTACGACGACGACCTCGACAA  
CCTCCTCGCCAGATCGGAGACCAGTACGCCGACCTTCTCCTCGCCGCCAAG  
AACCTCTCCGACGCCATCCTCCTCTCCGACATCCTCCGTGTCAACACCGAGAT  
CACCAAGGCCCACTCTCCGCCTCCATGATCAAGCGTTACGACGAGCACCAC  
CAGGACCTCACCTCCTCAAGGCCCTCGTCCGTCAGCAGCTCCCAGAGAAGT  
ACAAGGAGATCTTCTTCGACCAGTCCAAGAACGGATACGCCGGATACATCG  
ACGGAGGAGCCTCCAGGAGGAGTTCTACAAGTTCATCAAGCCAATCCTCG  
AGAAGATGGACGGAACCGAGGAGCTCCTCGTCAAGCTCAACCGTGAGGAC  
CTCCTCCGTAAGCAGCGTACCTTCGACAACGGATCCATCCCACACCAGATCC  
ACCTCGGAGAGCTCCACGCCATCCTCCGTCTGTCAGGAGGACTTCTACCCATT  
CCTCAAGGACAACCGTGAGAAGATCGAGAAGATCCTCACCTTCCGTATCCC  
ATACTACGTCGGACCACTCGCCCGTGAAACTCCCGTTTCGCCTGGATGAC  
CCGTAAGTCCGAGGAGACCATCACCCATGGAACCTTCGAGGAGGTCGTCG  
ACAAGGGAGCCTCCGCCAGTCTTCATCGAGCGTATGACCAACTTCGACA  
AGAACCTCCCAAACGAGAAGGTCTCCCAAAGCACTCCCTCCTTACGAGTA  
CTTACCCGTCTACAACGAGCTCACCAAGGTCAAGTACGTACCCGAGGGAAT  
GCGTAAGCCAGCCTTCTCCTCCGGAGAGCAGAAGAAGGCCATCGTCGACC  
TCCTCTTCAAGACCAACCGTAAGGTACCGTCAAGCAGCTCAAGGAGGACT  
ACTTCAAGAAGATCGAGTGCTTCGACTCCGTCGAGATCTCCGGAGTCGAG  
GACCGTTTTCAACGCCTCCCTCGGAACCTACCACGACCTCCTCAAGATCATCA  
AGGACAAGGACTTCTCGACAACGAGGAGAACGAGGACATCCTCGAGGA  
CATCGTCTCACCTCACCTCTTCGAGGACCGTGAGATGATCGAGGAGCG  
TCTCAAGACCTACGCCACCTCTTCGACGACAAGGTCATGAAGCAGCTCAA  
GCGTCGTCTGTTACACCGGATGGGGACGTCTCTCCCGTAAGCTCATCAACGG  
AATCCGTGACAAGCAGTCCGGAAAGACCATCCTCGACTTCTCAAGTCCGA  
CGGATTCGCCAACCGTAACGTAAGTTTAAACATGATTTTACTAACTAACTA

ATCTGATTTAAATTTTCAGTTCATGCAGCTCATCCACGACGACTCCCTCACC  
TTCAAGGAGGACATCCAGAAGGCCAGGTCTCCGGACAGGGAGACTCCC  
TCCACGAGCACATCGCCAACCTCGCCGATCCCCAGCCATCAAGAAGGGA  
ATCCTCCAGACCGTCAAGGTCGTGACGAGCTCGTCAAGGTCATGGGAC  
GTCACAAGCCAGAGAACATCGTCATCGAGATGGCCCGTGAGAACCAGA  
CCACCCAGAAGGGACAGAAGAACTCCCGTGAGCGTATGAAGCGTATCG  
AGGAGGGAATCAAGGAGCTCGGATCCCAGATCCTCAAGGAGCACCCAG  
TCGAGAACACCCAGCTCCAGAACGAGAAGCTCTACCTCTACTACCTCCAG  
AACGGACGTGACATGTACGTGACCAGGAGCTCGACATCAACCGTCTCT  
CCGACTACGACGTGACCACATCGTCCCACAGTCCTTCTCAAGGACGAC  
TCCATCGACAACAAGGTCTCACCCGTTCCGACAAGAACCGTGGAAGT  
CCGACAACGTCCCATCCGAGGAGGTCGTCAAGAAGATGAAGAACTACT  
GGCGTCAGCTCCTCAACGCCAAGCTCATCACCCAGCGTAAGTTCGACAA  
CCTACCAAGGCCGAGCGTGGAGGACTCTCCGAGCTCGACAAGGCCGG  
ATTCATCAAGCGTCAGCTCGTCGAGACCCGTCAGATCACCAAGCACGTC  
GCCAGATCCTCGACTCCCGTATGAACACCAAGTACGACGAGAACGACA  
AGCTCATCCGTGAGGTCAAGGTCATCACCCCTCAAGTCCAAGCTCGTCTCCG  
ACTTCCGTAAGGACTTCCAGTTCTACAAGGTCCGTGAGATCAACAACCTACC  
ACCACGCCACGACGCTACCTCAACGCCGTGTCGGAACCGCCCTCATCAA  
GAAGTACCCAAAGCTCGAGTCCGAGTTCGTCTACGGAGACTACAAGGTCT  
ACGACGTCCGTAAGATGATCGCCAAGTCCGAGCAGGAGATCGGAAAGG  
CCACCGCCAAGTACTTCTTCTACTCCAACATCATGAACTTCTTCAAGACCGA  
GATCACCTCGCCAACGGAGAGATCCGTAAGCGTCCACTCATCGAGACCA  
ACGGAGAGACCGGAGAGATCGTCTGGGACAAGGGACGTGACTTCGCCA  
CCGTCCGTAAGGTCTCTCCATGCCACAGGTCAACATCGTCAAGAAGACC  
GAGGTCCAGACCGGAGGATTCTCCAAGGAGTCCATCCTCCCAAAGCGTA  
ACTCCGACAAGTCTATCGCCCGTAAGAAGGACTGGGACCCAAAGAAGTA  
CGGAGGATTCGACTCCCAACCGTCGCCTACTCCGTCTCGTCGTCGCCA  
AGGTGCGAGAAGGGAAAGTCCAAGAAGCTCAAGTCCGTCAAGGAGCTC  
CTCGGAATCACCATCATGGAGCGTTCCTCCTTCGAGAAGAACCCAATCG  
ACTTCTCGAGGCCAAGGGATACAAGGAGGTCAAGAAGGACCTCATCA  
TCAAGTCCCAAAGTACTCCCTCTTCGAGCTCGAGAACGGACGTAAGCG  
TATGCTCGCCTCCGCCGGAGAGCTCCAGAAGGGAAACGAGCTCGCCCT  
CCCATCCAAGTACGTCAACTTCTCTACCTCGCCTCCCACTACGAGAAGC  
TCAAGGGATCCCCAGAGGACAACGAGCAGAAGCAGCTCTTCGTCGAG  
CAGCACAAGCACTACCTCGACGAGATCATCGAGCAGATCTCCGAGTTC  
TCCAAGCGTGTATCCTCGCCGACGCCAACCTCGACAAGGTCTCTCCG  
CCTACAACAAGCACCGTGACAAGCCAATCCGTGAGCAGGCCGAGAACA  
TCATCCACCTCTTACCCCTACCAACCTCGGAGCCCCAGCCGCCTTCAAG  
TACTTCGACACCACCATCGACCGTAAGCGTTACACCTCCACCAAGGAGG  
TCCTCGACGCCACCCTCATCCACCAGTCCATCACCGGACTCTACGAGACC  
CGTATCGACCTCTCCAGCTCGGAGGAGACTCCCGTGCCGACCCAAAG  
AAGAAGCGTAAGGTCTGA

### **Peft-3::Cas9-SV40 NLS::tbb-2 3'UTR vector primers**

pUC57 EcoRI Peft-3 F

CGACGTTGTAACGACGGCCAGTGAATTCGCACCTTTGGTCTTTTATTGTCAACT

Peft-3 cas9 start R

GTCGAGTCCGATGGAGTACTTCTTGCCATTAAGCCTGCTTTTTGTACAACTTGTGAG

cas9 start F

ATGGACAAGAAGTACTCCATCGGACTCGAC

cas9 tbb-2 UTR R

GGGAATGCTGAAAGGATTTGCATTTATCTCAGACCTTACGCTTCTTCTTGG

tbb-2 UTR F

GATAAATGCAAATCCTTTCAAGCATTCC

tbb-2 UTR pUC57 R

AACAGCTATGACCATGATTACGCCAAGCTTTGAGACTTTTTCTTGCGGCACA

### **U6 pol III promoter, sgRNA, and downstream sequence**

CTCCAAGAACTCGTACAAAAATGCTCTGAAGTAGGTCTCGAGATCAA  
TACTGGGAAGACGAAAGTCTTGCGAAACCGATTGCTGACCCCAGTA  
AAGTCTACTTCGGTAGCCCTTCCCCACCACCCAGCTCGACGACGTCGA  
CGAGTACATCTACCTCGGTCGTCAAATCAACGCCCAAAACAATTGAT  
GCCGAAATCCACCGAAGACGTCGAGCAGCCTGGGCTGCATTCAATG  
GAATCAAGAATGCCACCGACTCCATCACCGACAAGAAGATTCGTGCG  
AATCTGTTGACTCAATTGTCCTCCAGCGCTCACCTACGTTTCAGAAG  
CCTGGACATTCACCAAAGCTCTATCCGAACGAGTACGAATCACACATG  
CCTCCCCACAAATTATTGATCTACATCCCCATTTGGTATAGTGTCTTA  
CAGGACTCTCAATATGTCAGCTGCATGATAAATGGTCCCTATATAATT  
GAATTGCAAATCTAAATGTTTGAATTTTCTGAAATTAAGAGTTTTA  
**GAGCTAGAAATAGCAAGTTAAAATAAGGCTAGTCCGTTATCAACTTG**  
**AAAAAGTGGCACCGAGTCGGTCTTTTTTCAATAATATTCTAGATA**  
TCCTTTTTGAAGCTAAAATGAAATACTCTAAATTTTTGAGTTCAATG  
TTTTCAACTAATCTTGGTTAAAGGTAAATTCCCGGAGGGACGATTTTA  
AAGTTGCCAGAGTTGATTAATTTGGTCCAAAAAATTTTATTAGGAA  
ACTCGAAAAAAATTTGATTTTTTTGACAATTTCCAAAGAAAATTA  
CAAATCTCGACGCCAAACATAGTCGGCTGTG

(unc-119 target sequence = bold and underlined; sgRNA scaffold sequence = bold)

### **Target genomic sequences**

|         |                         |
|---------|-------------------------|
| unc-119 | GAATTTTCTGAAATTAAGACGG  |
| dpy-13  | GGACATTGACACTAAAATCAAGG |
| klp-12  | GATCCACAAGTTACAATTGGTGG |

Y61A9LA.1 GGATGGATGTGTAGTCAATTCGG

### U6 pol III promoter expression vector and sgRNA primers

U6prom EcoRI F

CGGGAATTCCTCCAAGAACTCGTACAAAAATGCTCT

U6prom HindIII R

CGGAAGCTTCACAGCCGACTATGTTTGGCGT

dpy-13 gRNA F

GGACATTGACACTAAAATCAGTTTTAGAGCTAGAAATAGCAAGTTA

dpy-13 gRNA R

TGATTTTAGTGTCAATGTCCAAACATTTAGATTTGCAATTCAATTATATAG

klp-12 gRNA F

GATCCACAAGTTACAATTGGGTTTTAGAGCTAGAAATAGCAAGTTA

klp-12 gRNA R

CCAATTGTAACTTGTGGATCAAACATTTAGATTTGCAATTCAATTATATAG

Y61A9LA.1 gRNA F

GGATGGATGTGTAGTCAATTGTTTTAGAGCTAGAAATAGCAAGTTA

Y61A9LA.1 gRNA R

AATTGACTACACATCCATCCAAACATTTAGATTTGCAATTCAATTATATAG

### RT-PCR primers

cas9 RT-PCR F

CAAGCGTCGTCGTTACACCGGA

cas9 RT-PCR R

CTGGAGGATTCCCTTCTTGATGG

unc-119 gRNA RT-PCR F

GAATTTTCTGAAATTAAGAGTTTTAGAGC

unc-119 gRNA RT-PCR R

GACTCGGTGCCACTTTTTCAAGTT

act-4 F

GTTTCCGTTGCCAGAGGCTCT

act-4 R

CTCGTCGTA CTCTTGCTTGAGAT

### Genotyping primers

dpy-13 gt F

CAACCTTGTCAACGGACGAAAGC

dpy-13 gt R

CATAGTTGTAGACGATTGGAAGAGTAAT

unc-119 NHEJ gt F

CACGGAACACGTGCTCTTCGAAA

unc-119 NHEJ gt R

CGATCCTTGAAAAAGTGCCGTTCAA

klp-12 gt F

CCATCGAATAATCCATCCACAAGTT

klp-12 gt R

GTTTCGCTTGGGGTGTGATGTT

Y61A9LA.1 gt F

CTCTCACTAGAAAATACACTTTTCAGC

Y61A9LA.1 gt R

AGTGCCATGAAGAACTCCTGCAT

### Off-target genotyping primers

unc-119\_off\_target\_1\_F CCT TGT GGA TAT GAA GTT TTG

unc-119\_off\_target\_1\_R GCC ACT TTT TGA CAG TAA GT  
unc-119\_off\_target\_2\_F TGT GGA TTC GAT AGG TTG AA  
unc-119\_off\_target\_2\_R CTC CTT GTG TTT CTC GTA AAT  
unc-119\_off\_target\_3\_F TCG TTG GAT ACT ATT CTG AAT GGG A  
unc-119\_off\_target\_3\_R GCT GTC GAA TAA ATC TTG CTA TGG A  
dpy-13\_off\_target\_1\_F CAA AAA GTA ACC TAC AGT TCT GTC C  
dpy-13\_off\_target\_1\_R GGA ACA AAT GGC AAC AAA GAT AC  
dpy-13\_off\_target\_2\_F CTT CTC CGG AAA AAG CTC GAA ATT  
dpy-13\_off\_target\_2\_R GCA TTT AAT TTG TTT TCC ATG CAA C  
klp-12\_off\_target\_1\_F GAC GCA GAC TTC TCA ACT GAT TT  
klp-12\_off\_target\_1\_R GAC AAC ACA TTT GGC TCA GTT TTG  
klp-12\_off\_target\_2\_F CCT GAT AAA CGG GTC TCC AAG A  
klp-12\_off\_target\_2\_R CGG TTG TAA AAC TAA CTC TTC CCA T  
Y61A9LA.1\_off\_target\_1 |CAA CAC TCA AGG AAA AAA GGC GAA  
Y61A9LA.1\_off\_target\_1 |CAT ATC TGT CCT CAG ATG GAT TAT G  
Y61A9LA.1\_off\_target\_2 |CTA GTC ATA CTG GTC CAT TAT GC  
Y61A9LA.1\_off\_target\_2 |CAT CAA TTT CGA CGC ATA TTA TCT C



**Supplementary Table 2:** List of all oligonucleotides and relevant sequences used in this study.
